# Supplementary figures and images for: Exploring Novel Biomarkers for an Acute Coronary Syndrome Diagnosis Utilizing Plasma Metabolomics
Source: Preprints.org preprint supplement (doi:10.20944/preprints202405.0426.v1), 2024-05-08

**Supplementary Materials**

Figure S1

**
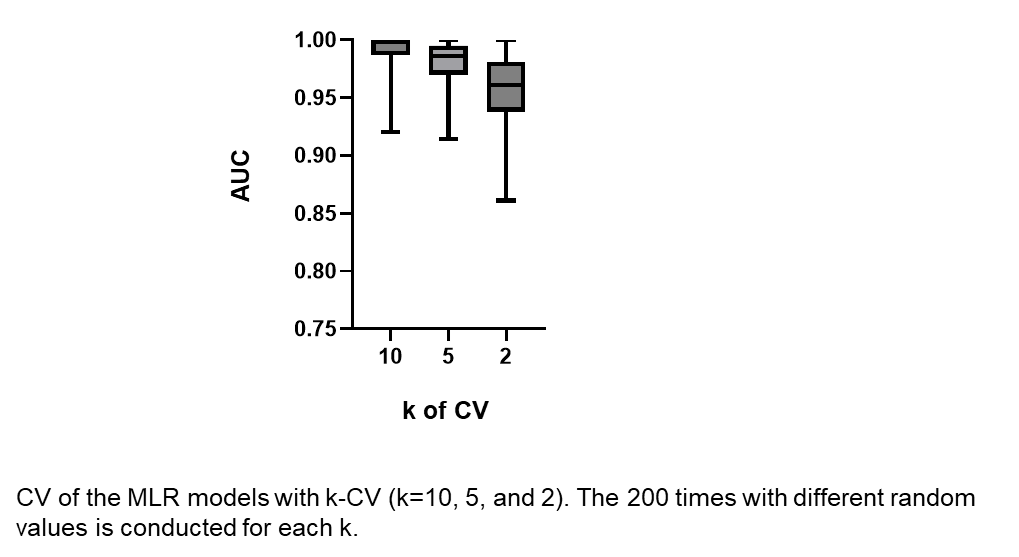
**

Supplement: Supplementary file 1 [file supplementary]
